# Supplementary material for: Early-Stage Detection of Biotic and Abiotic Stress on Plants by Chlorophyll Fluorescence Imaging Analysis
Source: MDPI journal article supplement (doi:10.3390/bios13080796), 2023-08-08
Supplement: s1 [file s1]

# Early-Stage Detection of Biotic and Abiotic Stress on Plants by Chlorophyll Fluorescence Imaging Analysis

Julietta Moustaka  and Michael Moustakas 

**Table S1.** Definitions of the most common used chlorophyll fluorescence parameters

| Parameter     | Definition                                                                                                                                     | Calculation                                                                                                                                                                    |
|---------------|------------------------------------------------------------------------------------------------------------------------------------------------|--------------------------------------------------------------------------------------------------------------------------------------------------------------------------------|
| $Fv/Fm$       | Maximum efficiency of PSII photochemistry                                                                                                      | $(Fm - Fo)/Fm$                                                                                                                                                                 |
| $\Phi_{PSII}$ | Effective quantum yield of PSII photochemistry                                                                                                 | $(Fm' - Fs)/Fm'$                                                                                                                                                               |
| $\Phi_{NPQ}$  | Quantum yield of regulated non-photochemical energy loss in PSII                                                                               | $Fs/Fm' - Fs/Fm$                                                                                                                                                               |
| $\Phi_{NO}$   | Quantum yield of nonregulated energy loss in PSII                                                                                              | $Fs/Fm$                                                                                                                                                                        |
| $Fv'/Fm'$     | Efficiency of PSII reaction centers                                                                                                            | $(Fm' - Fo')/Fm'$                                                                                                                                                              |
| $Fv/Fo$       | Efficiency of the oxygen evolving complex (OEC) on the donor side of PSII                                                                      | $(Fm - Fo)/Fo$                                                                                                                                                                 |
| ETR           | Electron transport rate                                                                                                                        | $\Phi_{PSII} \times PAR \times c \times abs$ , where PAR is the photosynthetically active radiation, c is 0.5, and abs is the total light absorption of the leaf taken as 0.84 |
| qp            | Photochemical quenching, representing the redox state of quinone A (QA), or in other words the fraction of PSII reaction centers in open state | $(Fm' - Fs)/(Fm' - Fo')$                                                                                                                                                       |
| NPQ           | Non-photochemical quenching reflecting the dissipation of excitation energy as heat                                                            | $(Fm - Fm')/Fm'$                                                                                                                                                               |
| EXC           | Excess excitation energy                                                                                                                       | $(Fv/Fm - \Phi_{PSII})/Fv/Fm$                                                                                                                                                  |
| 1-qp          | Excitation pressure                                                                                                                            | $1 - [(Fm' - Fs)/(Fm' - Fo')]$                                                                                                                                                 |
